# Supplementary material
Source: PubMed Central journal article supplement (PMC8178194)

Supplementary Figure 1

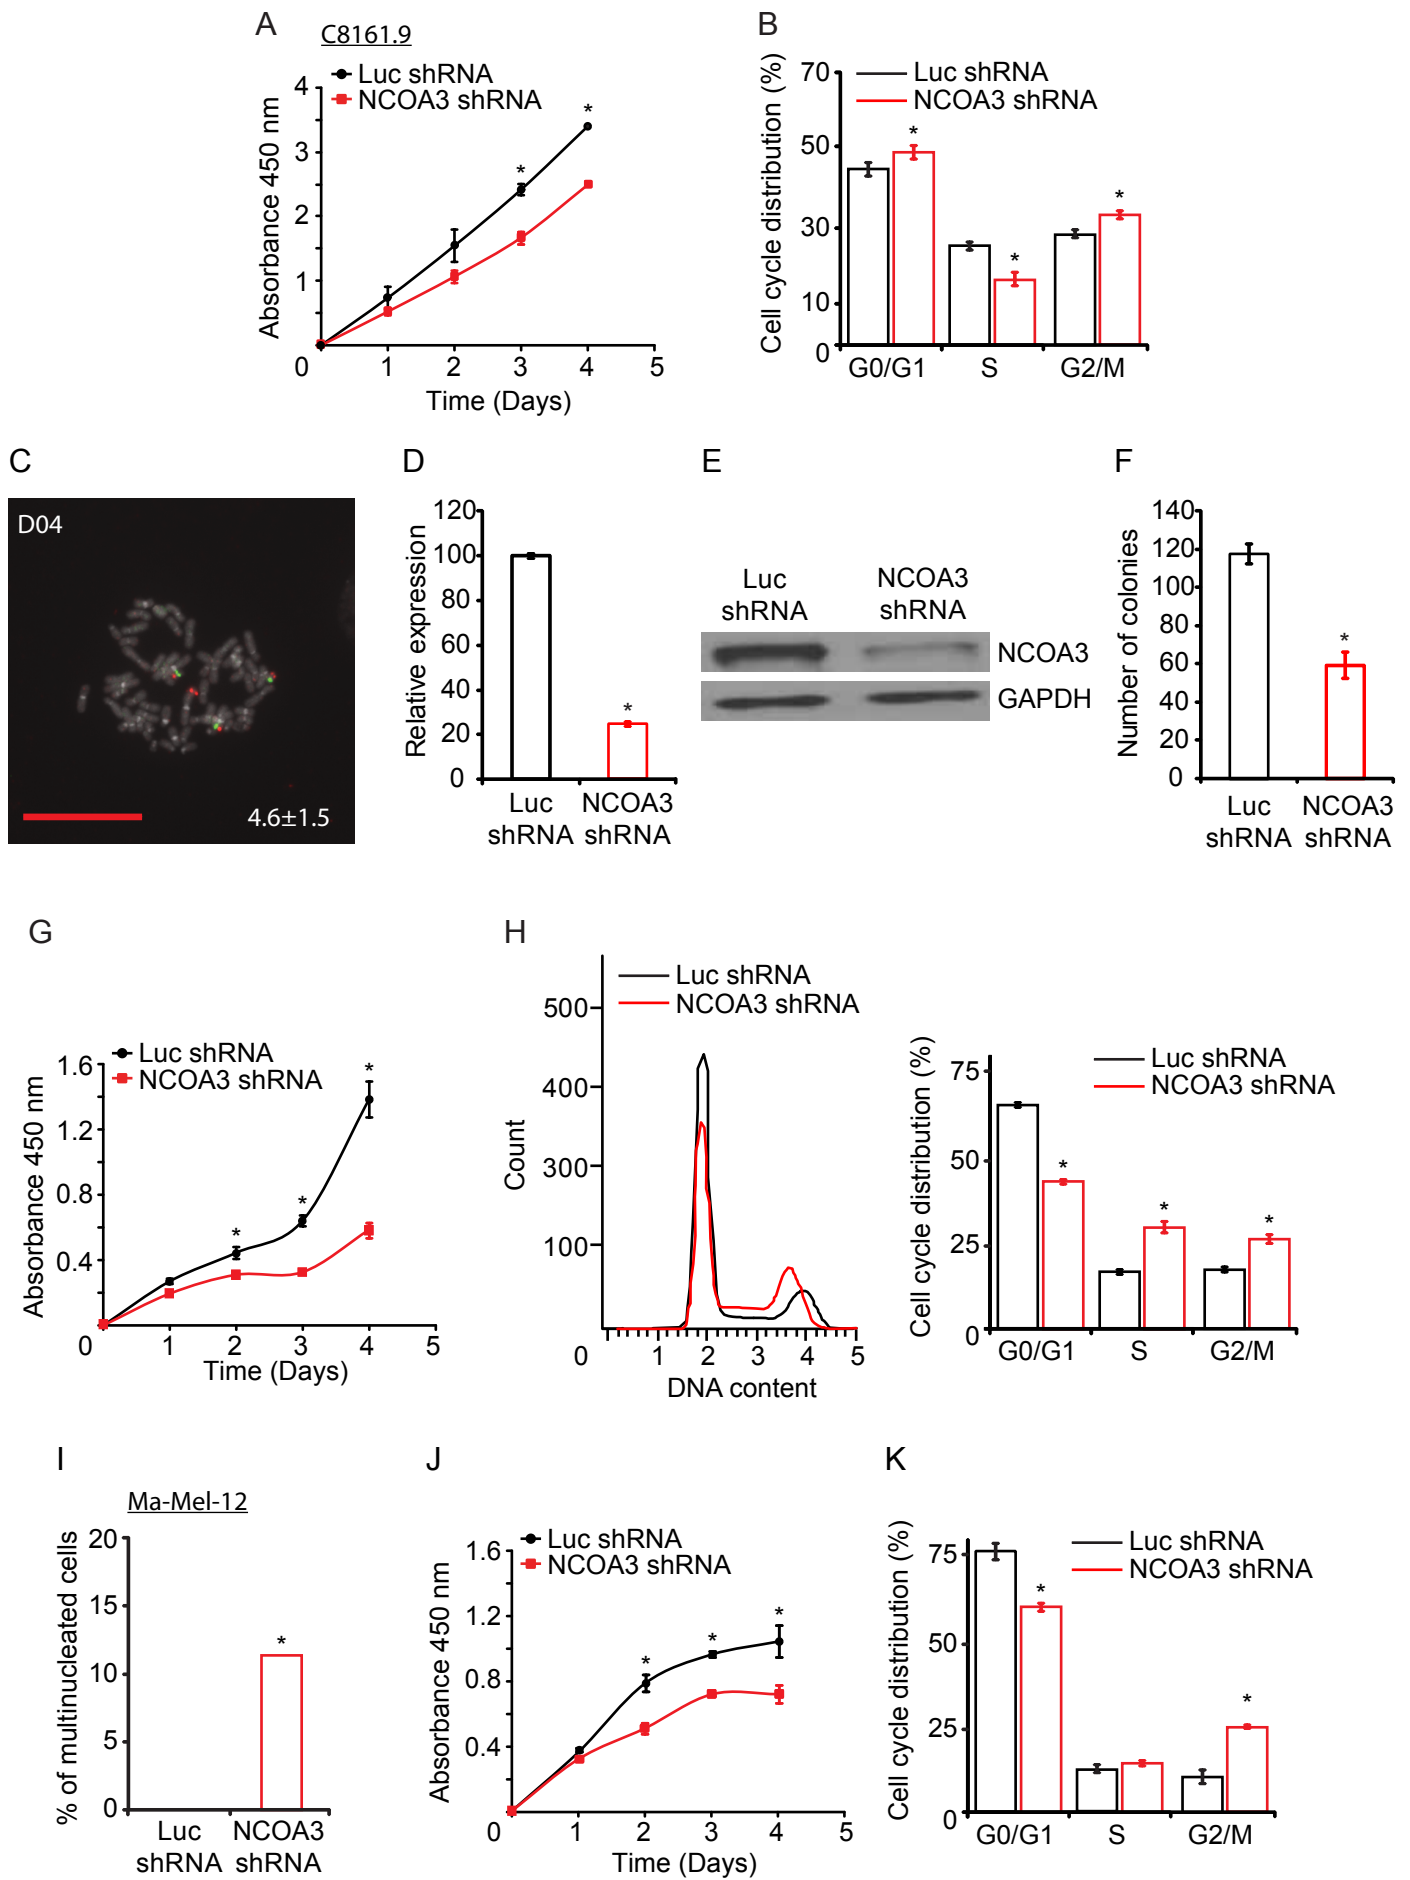

Supplement: NIHMS1686859-supplement-2.pdf [file NIHMS1686859-supplement-2.pdf]

A

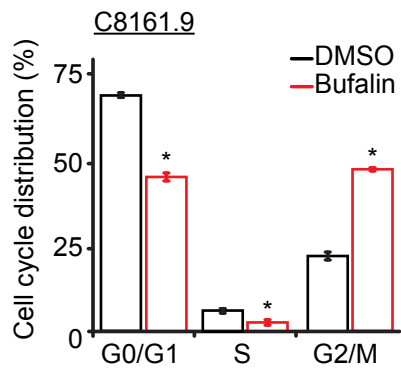

B

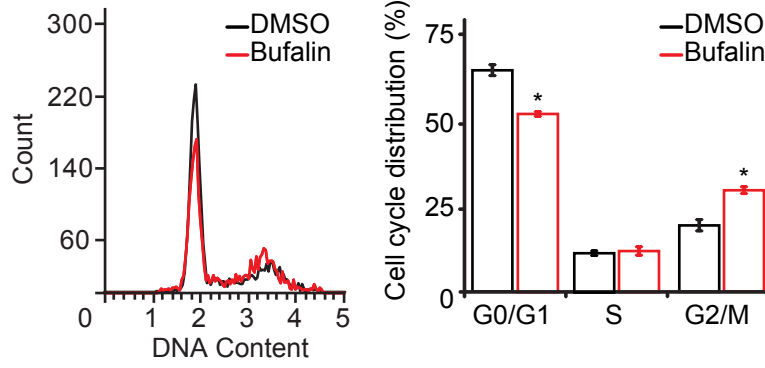

C

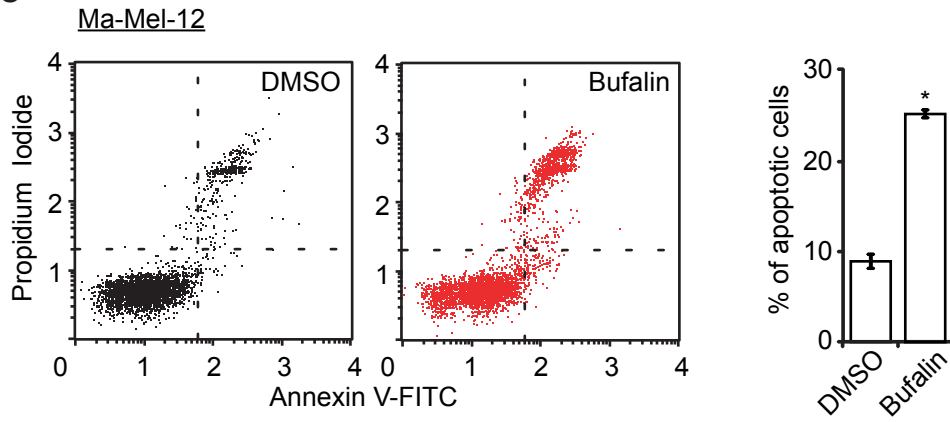

D

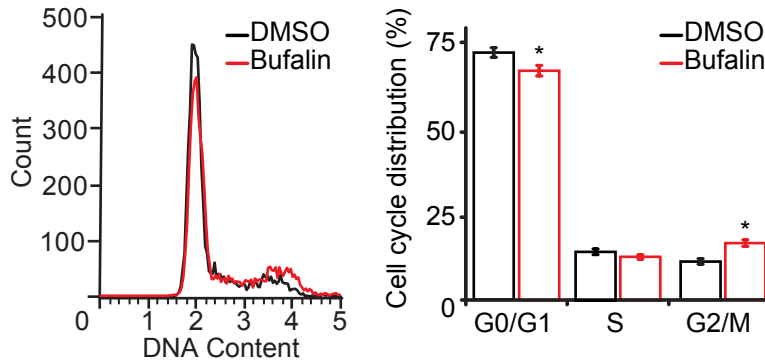

E

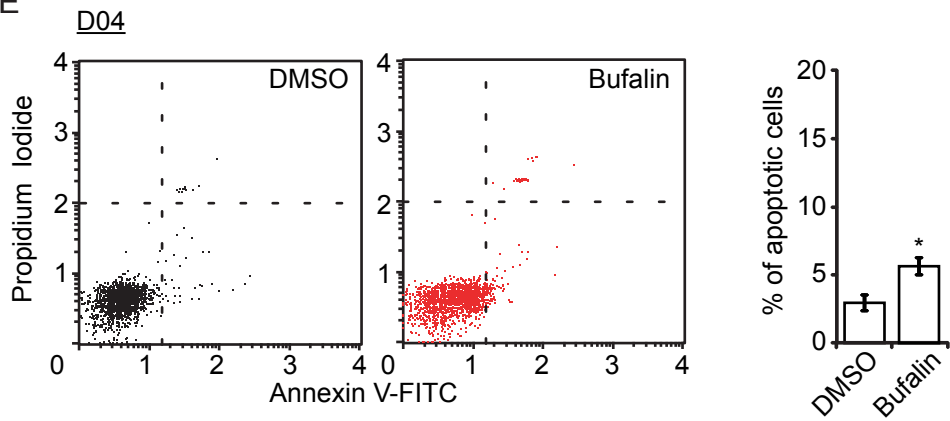

Supplement: NIHMS1686859-supplement-3.pdf [file NIHMS1686859-supplement-3.pdf]

Supplementary Figure 3

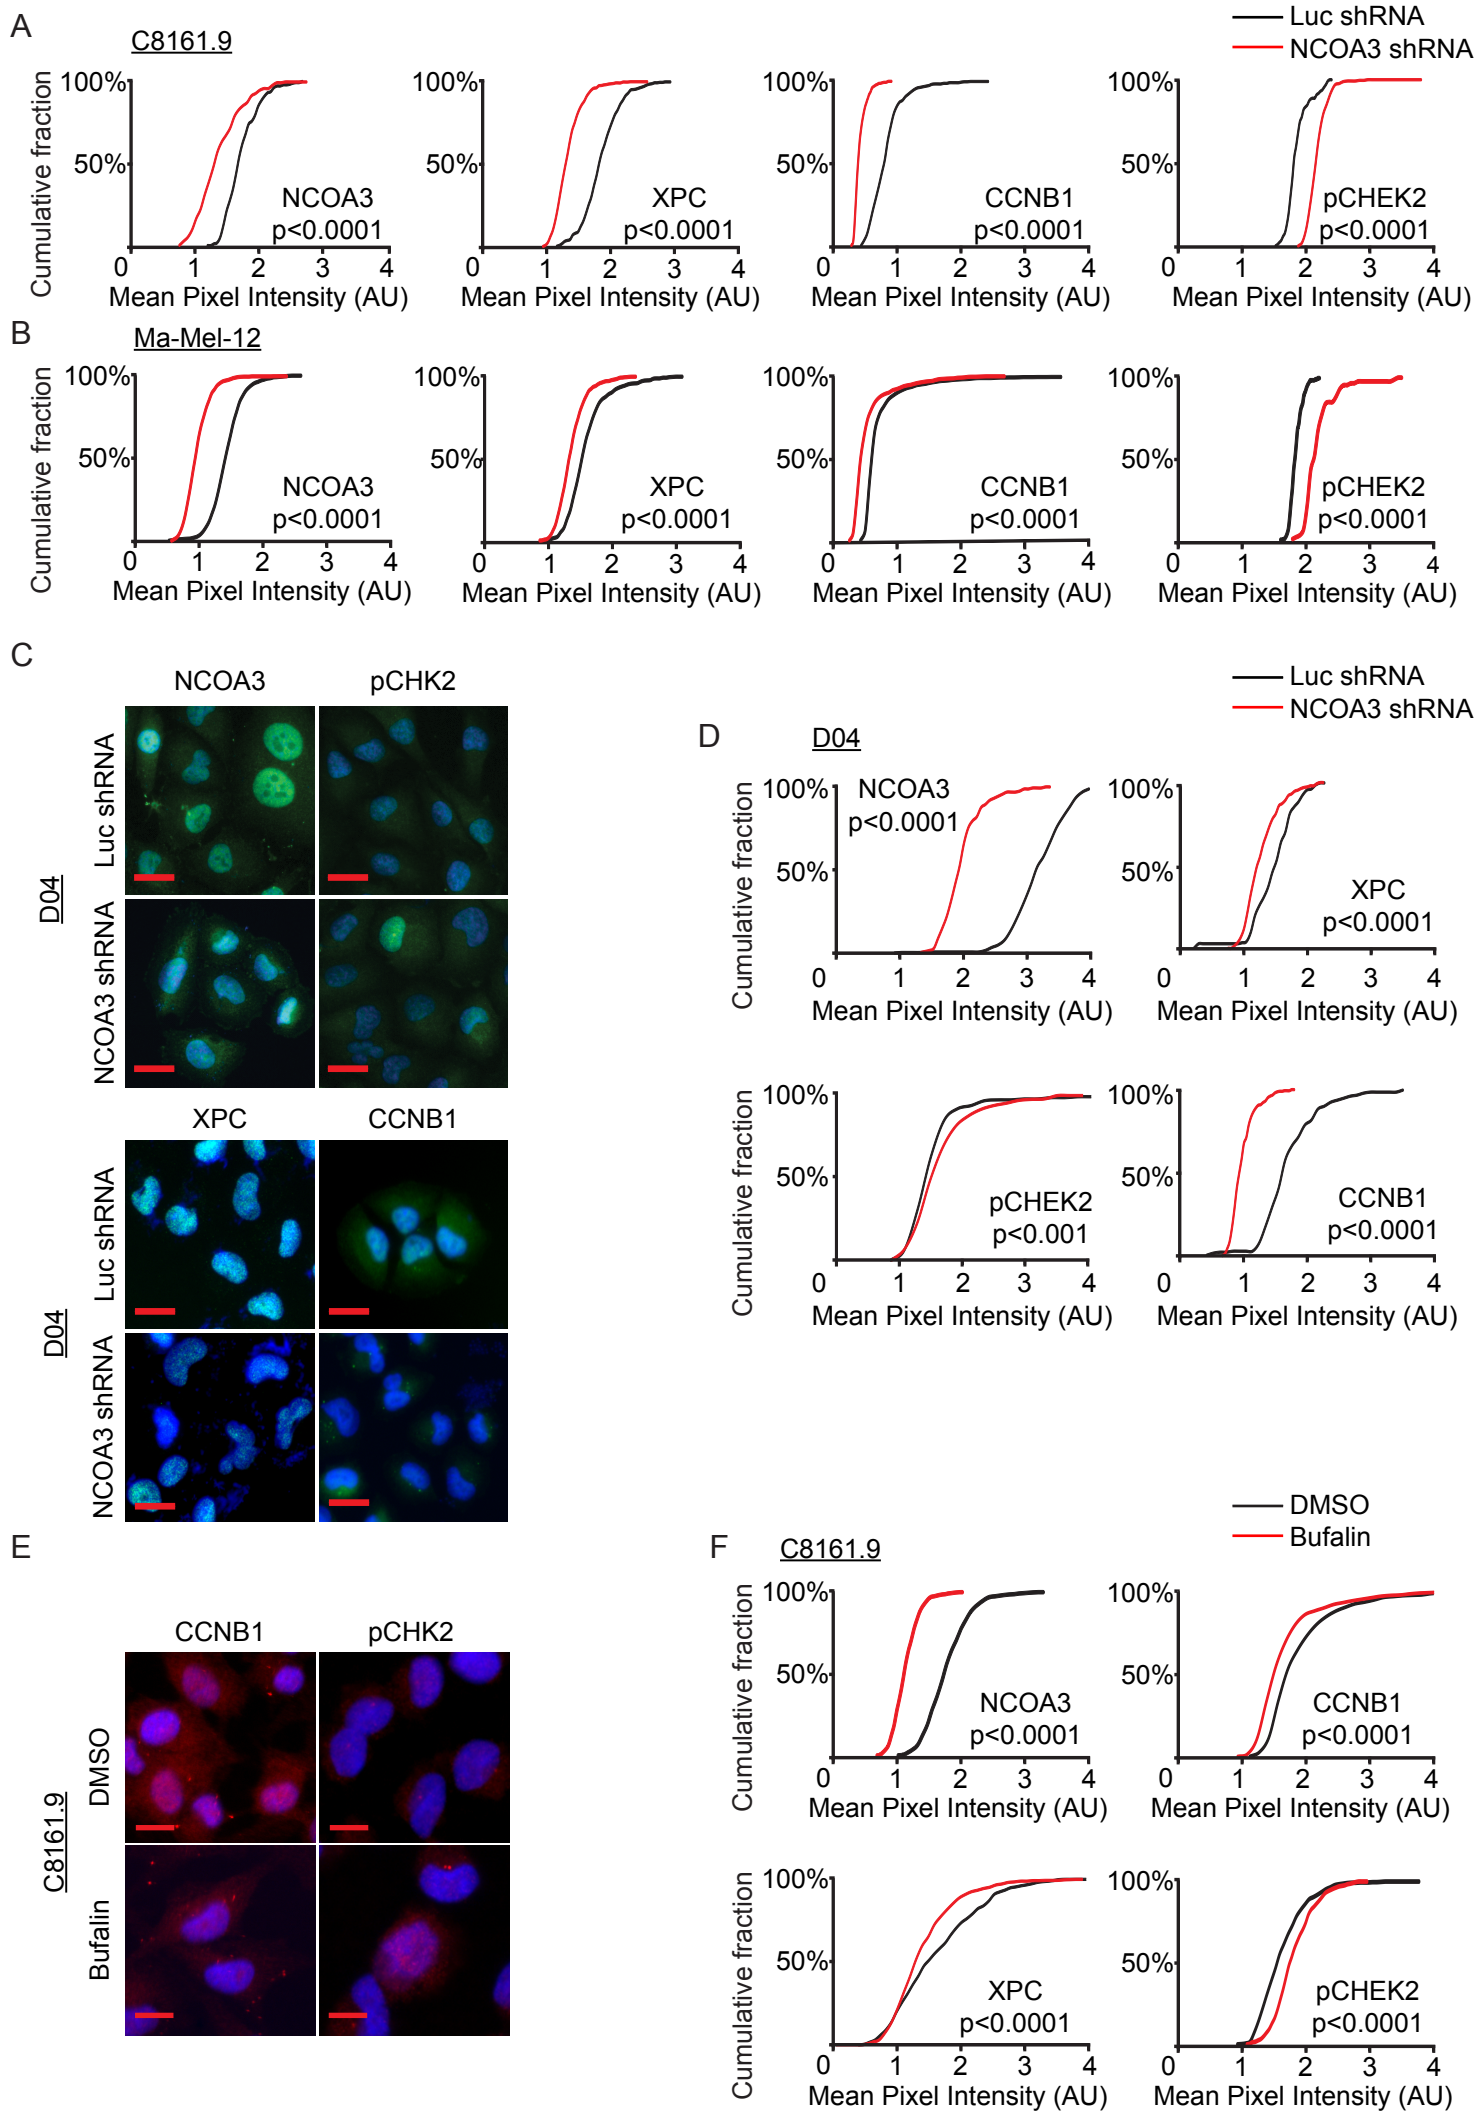

Supplement: NIHMS1686859-supplement-4.pdf [file NIHMS1686859-supplement-4.pdf]

Supplementary Figure 4

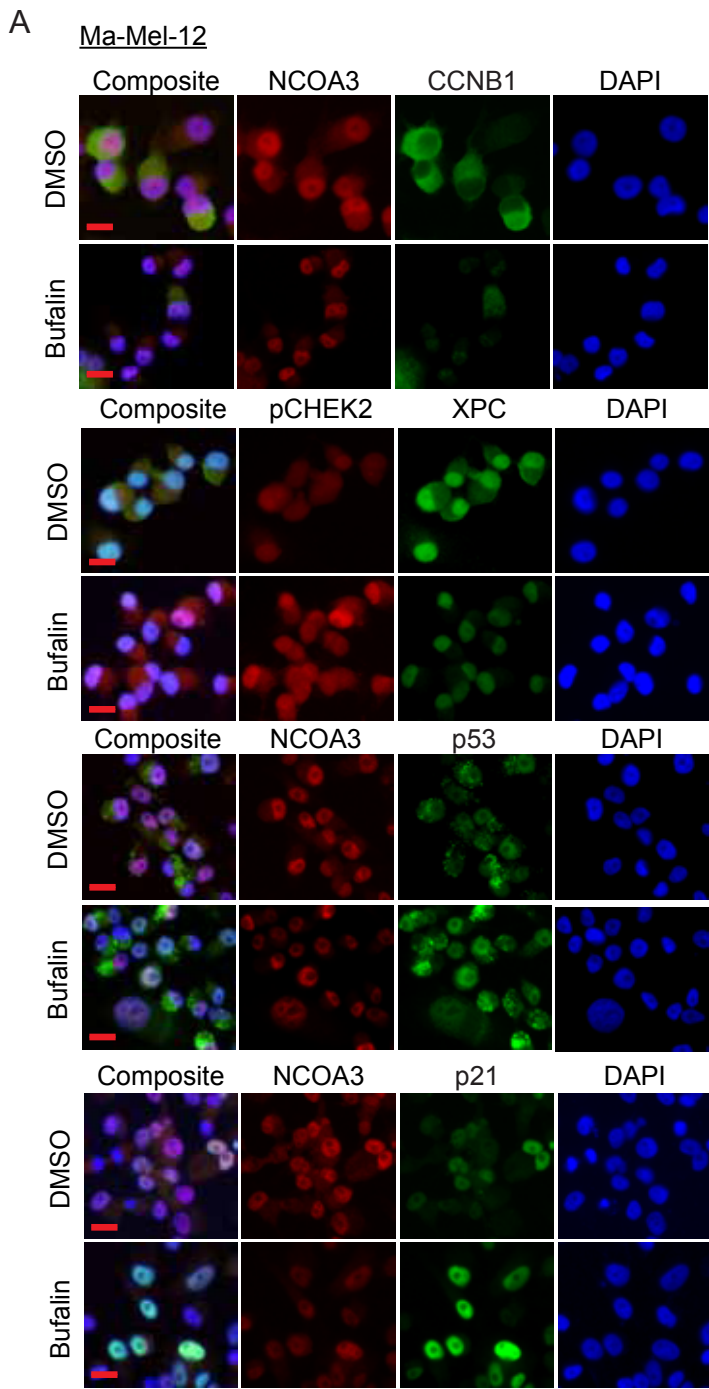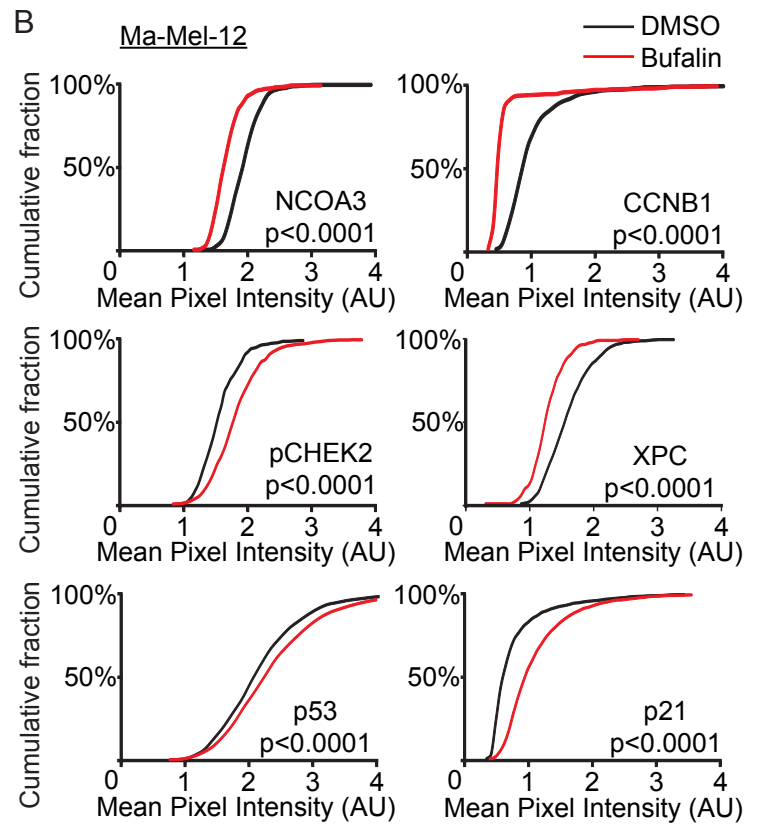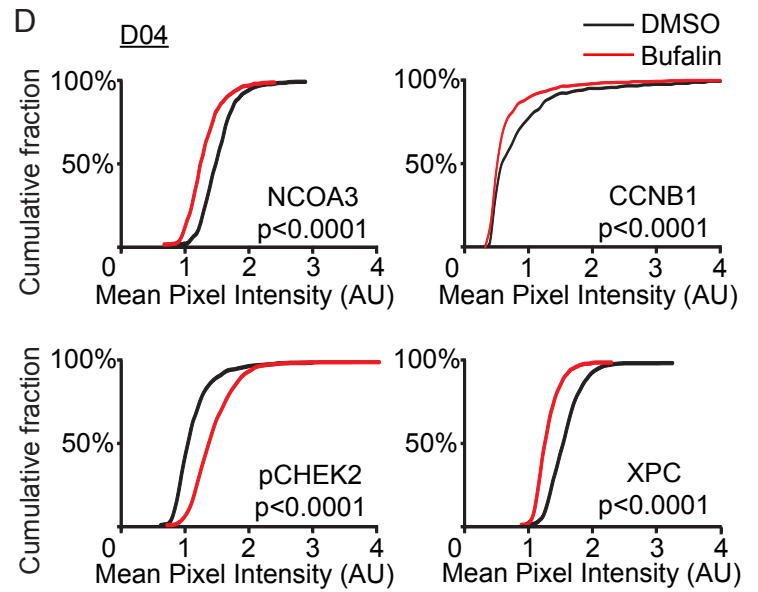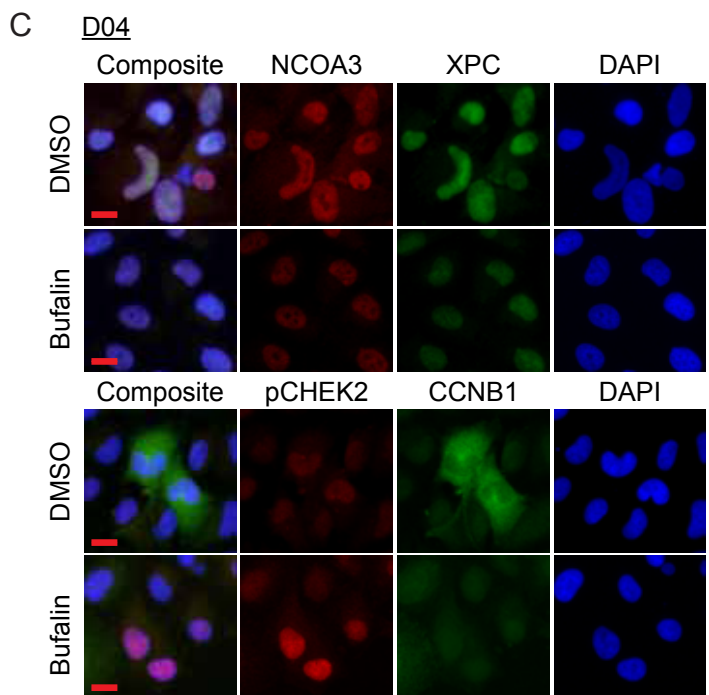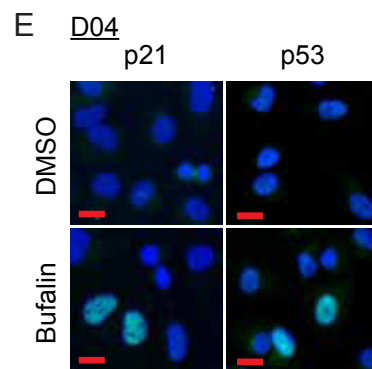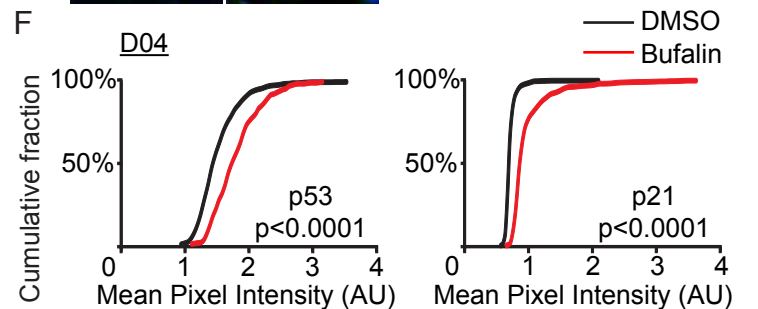

Supplement: NIHMS1686859-supplement-5.pdf [file NIHMS1686859-supplement-5.pdf]

Supplementary Figure 5

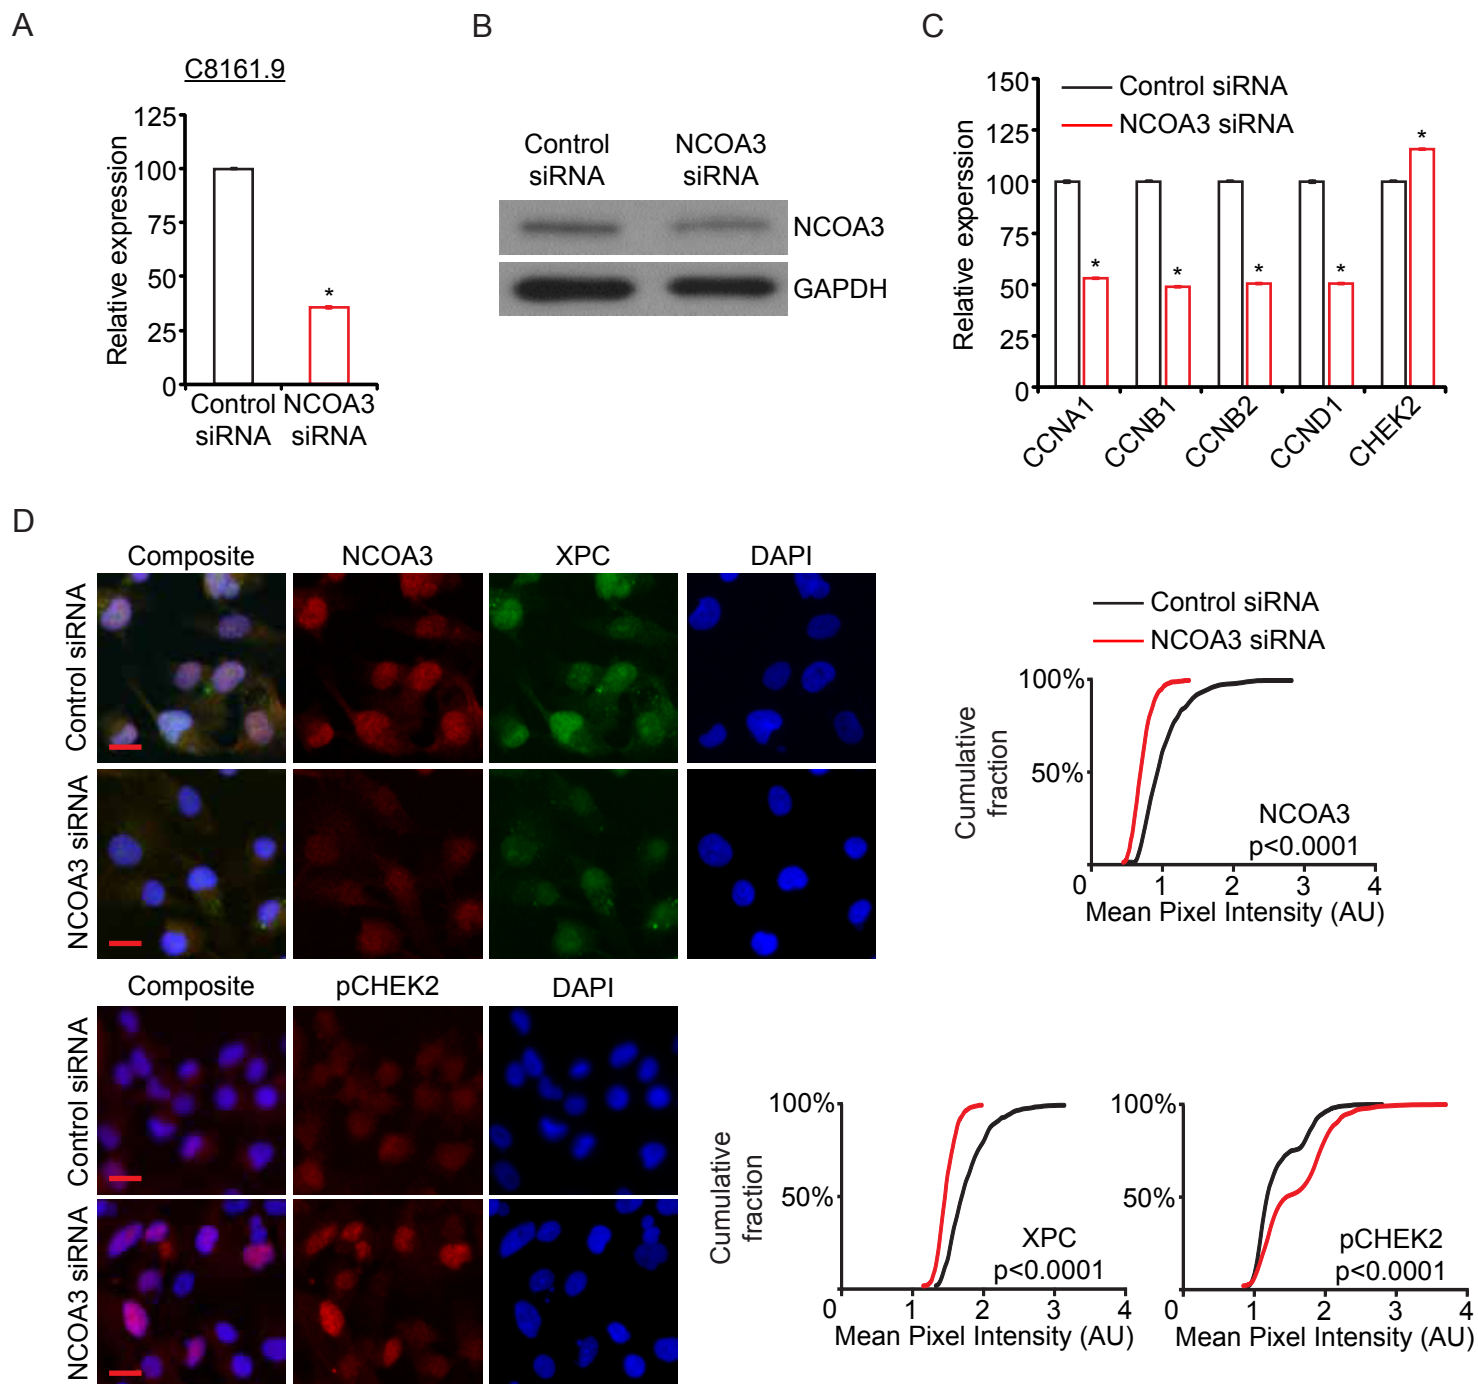

Supplement: NIHMS1686859-supplement-6.pdf [file NIHMS1686859-supplement-6.pdf]

Supplementary Figure 6

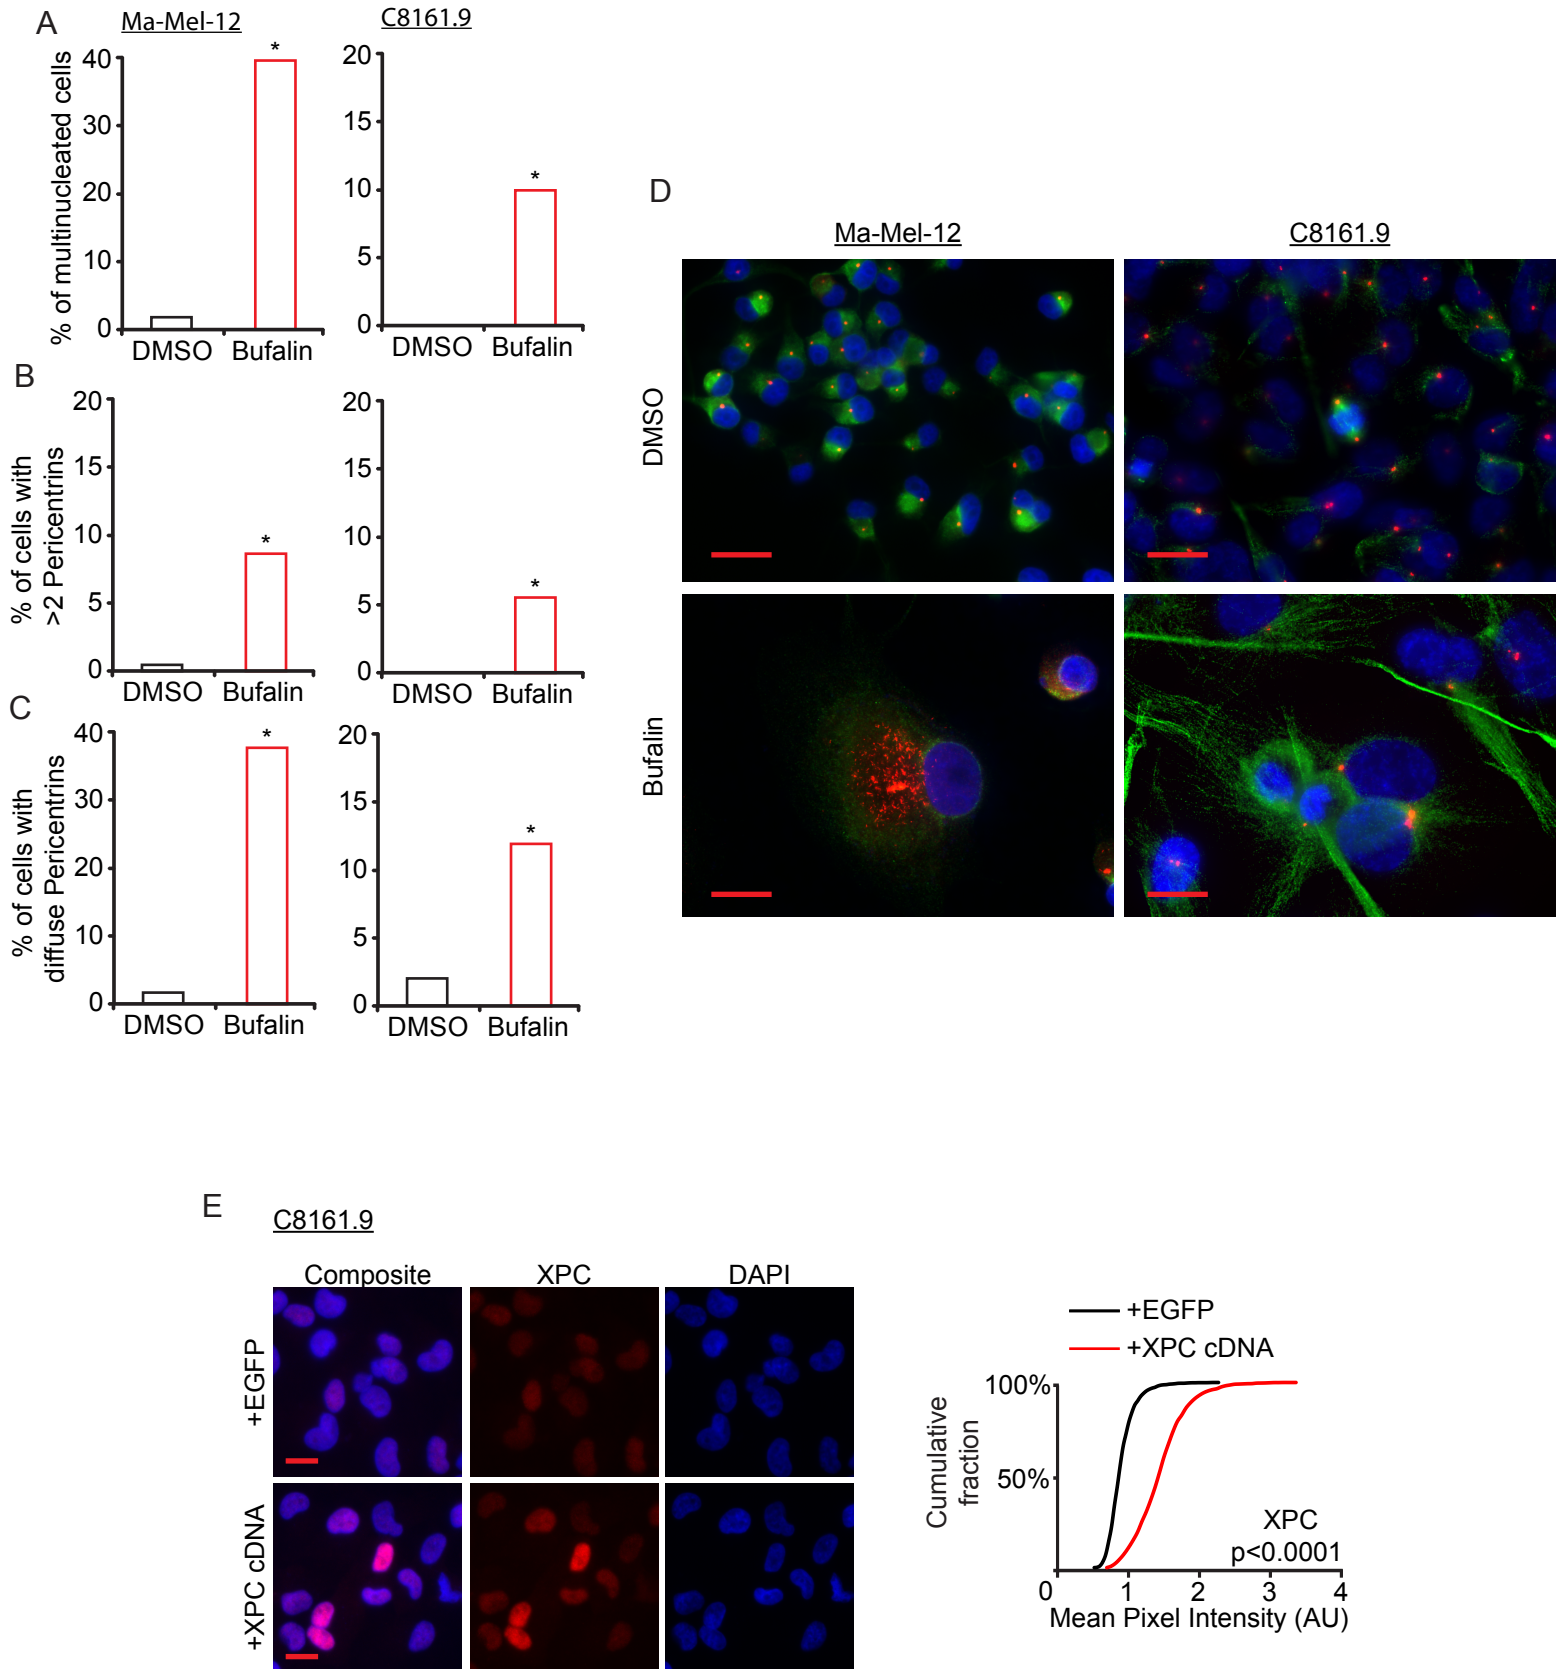

Supplement: NIHMS1686859-supplement-7.pdf [file NIHMS1686859-supplement-7.pdf]

Supplementary Figure 7

A

NHEM

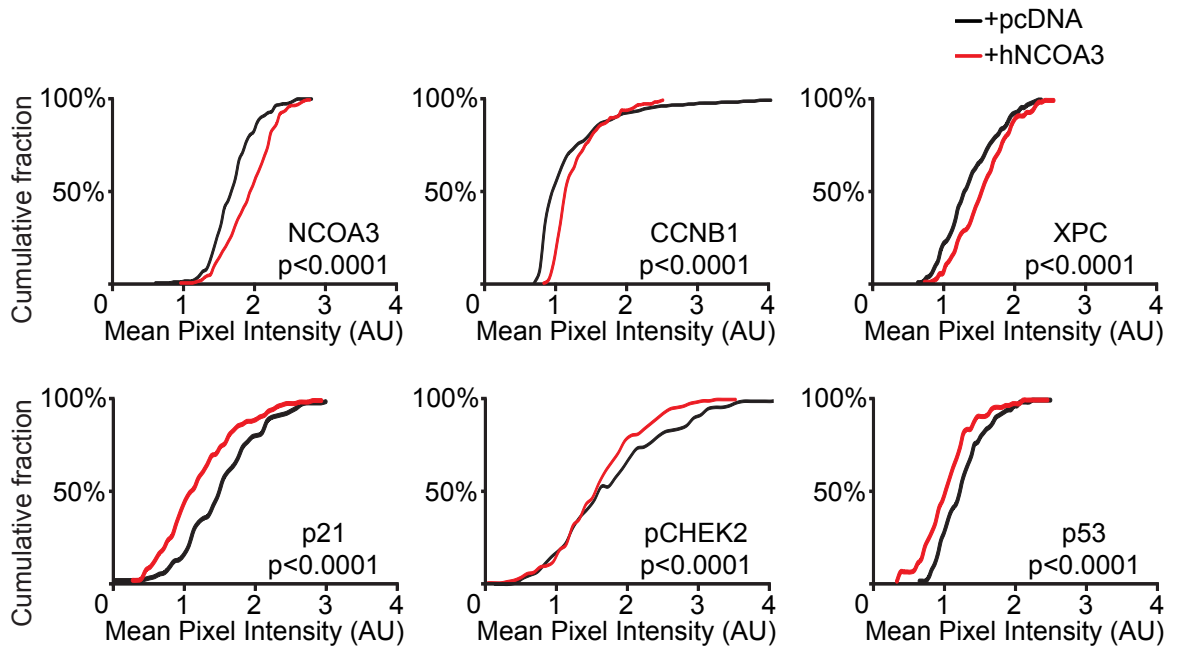

B

Mel-F-Neo

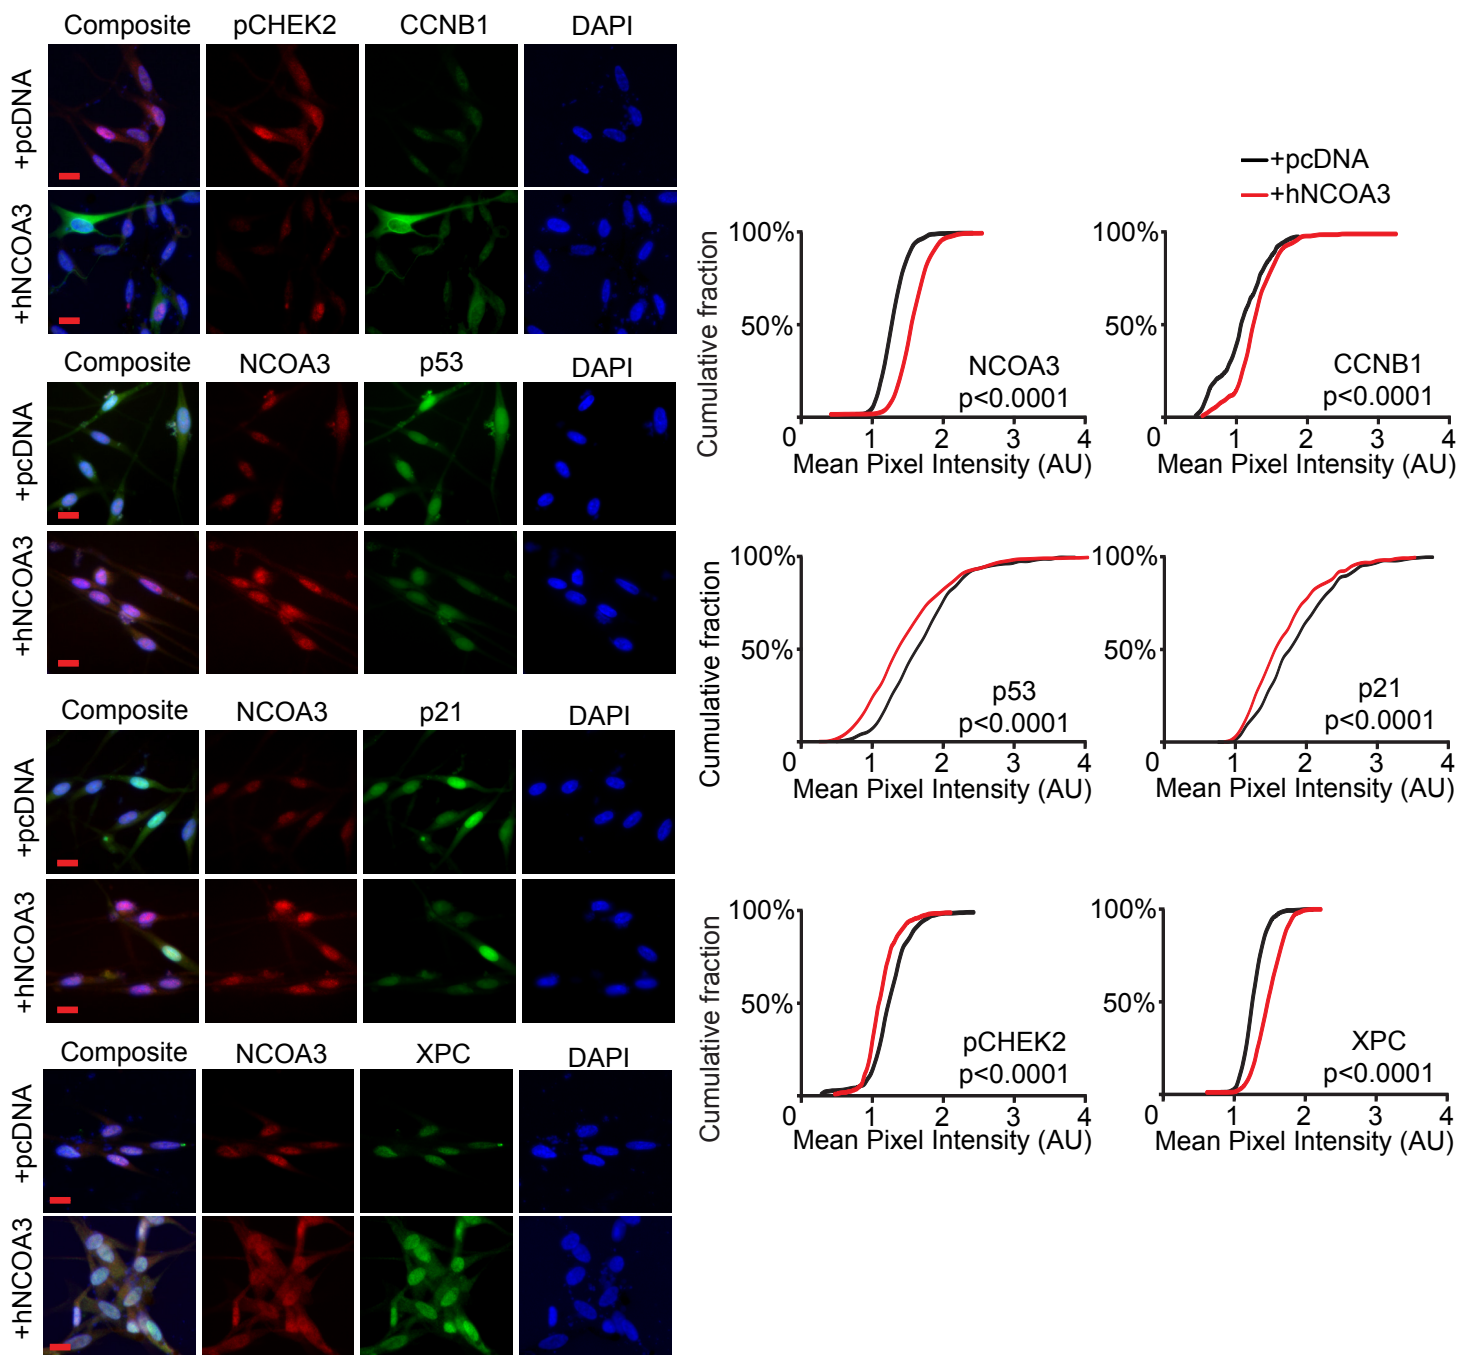

Supplement: NIHMS1686859-supplement-8.pdf [file NIHMS1686859-supplement-8.pdf]

A

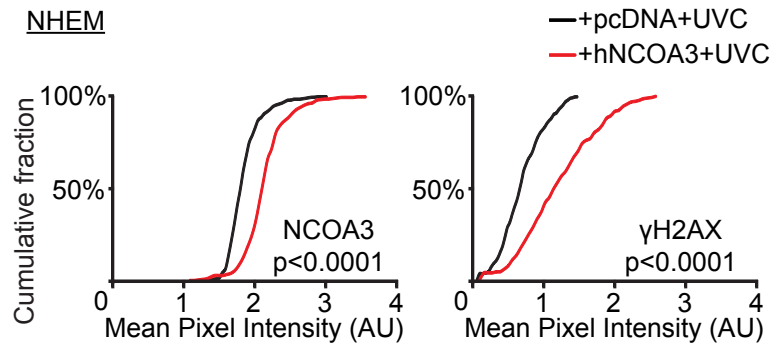

B Mel-F-Neo

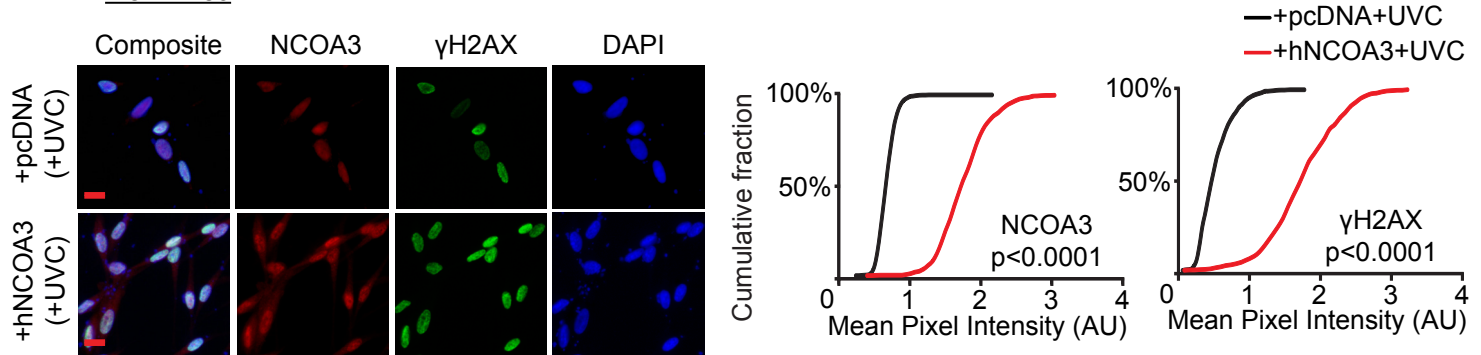

C NHEM

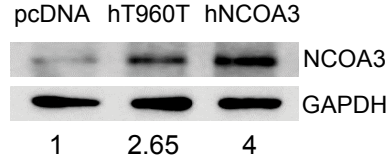

D

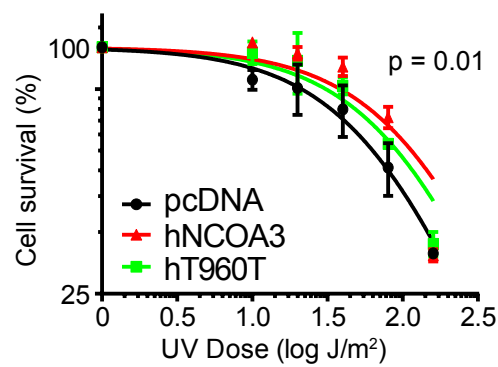

E

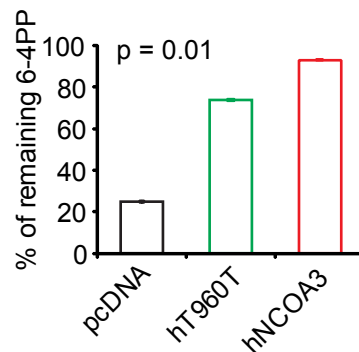

Supplement: NIHMS1686859-supplement-9.pdf [file NIHMS1686859-supplement-9.pdf]
